# Supplementary material for: Synthesis of rare-earth doped ZnO nanorods and their defect–dopant correlated enhanced visible-orange luminescence
Source: Royal Society of Chemistry journal article supplement (doi:10.1039/c6ra02278b), 2016-01-01
Supplement: c6ra02278b1.pdf [file c6ra02278b1.pdf]

## **Electronic Supplementary Information**

### **Synthesis of rare-earth doped ZnO nanorods and their defect-dopant correlated enhanced visible-orange luminescence**

*Arunasish Layek<sup>\*</sup>, Subhasree Banerjee, Biswajit Manna,<sup>†</sup> and Arindam Chowdhury*

Department of Chemistry, Indian Institute of Technology Bombay, Mumbai 400076, India

<sup>†</sup> Present Address: Bhabha Atomic Research Centre, radiation & Photochemistry Division

Trombay Mumbai, Maharashtra, IN 400085

#### **Corresponding Author**

\*Email: [arrunasis@gmail.com](mailto:arrunasis@gmail.com)

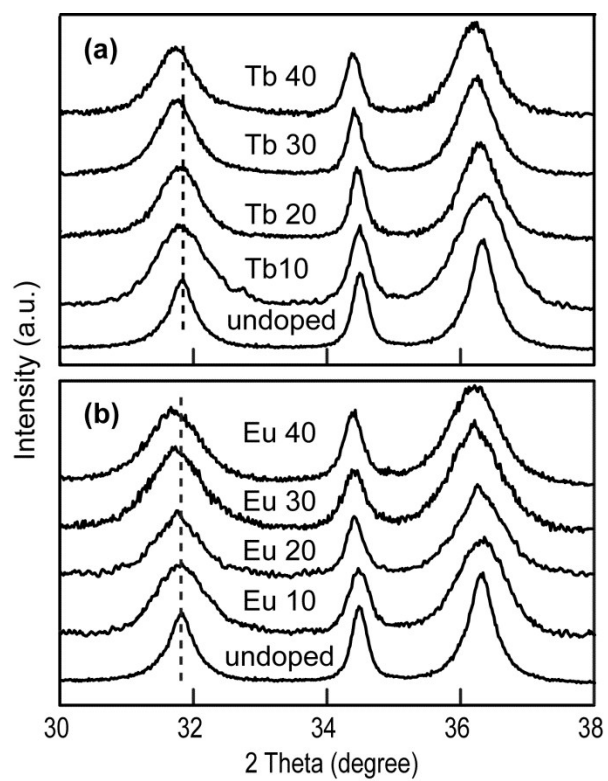

**Fig. S1** XRD pattern shows diffraction peaks shift to lower angle with increasing doping concentration indicating expansion of the ZnO lattice.

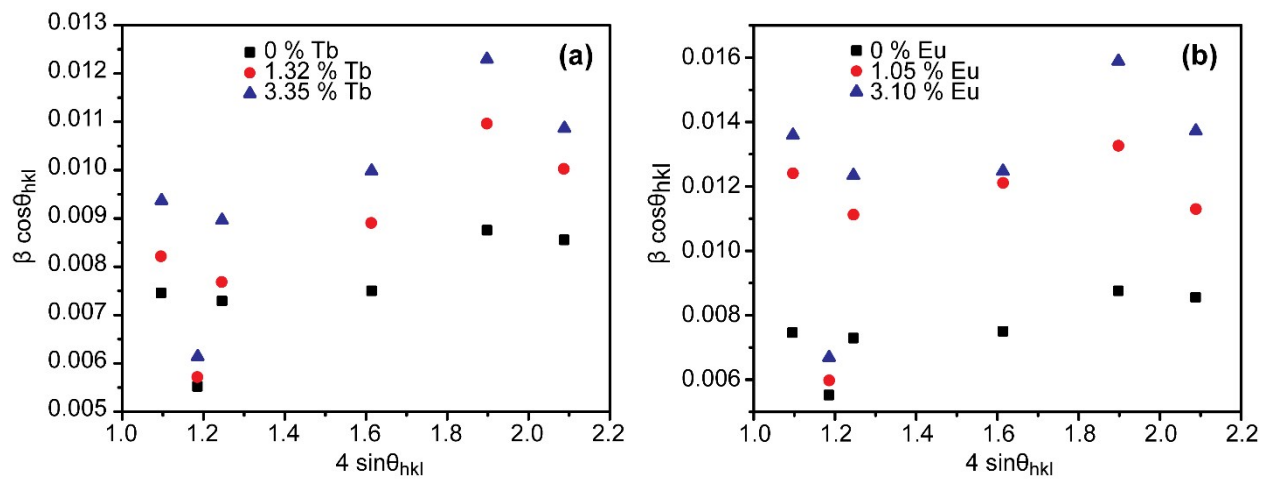

**Fig. S2** The Williamson-Hall (W-H) analysis of XRD peak broadening of (a) Tb-doped and (b) Eu-doped ZnO nanorods respectively. The non-linear behavior W-H plot indicates anisotropic strain. It is noted that there is plausible increase in strain with higher dopant content in ZnO host.

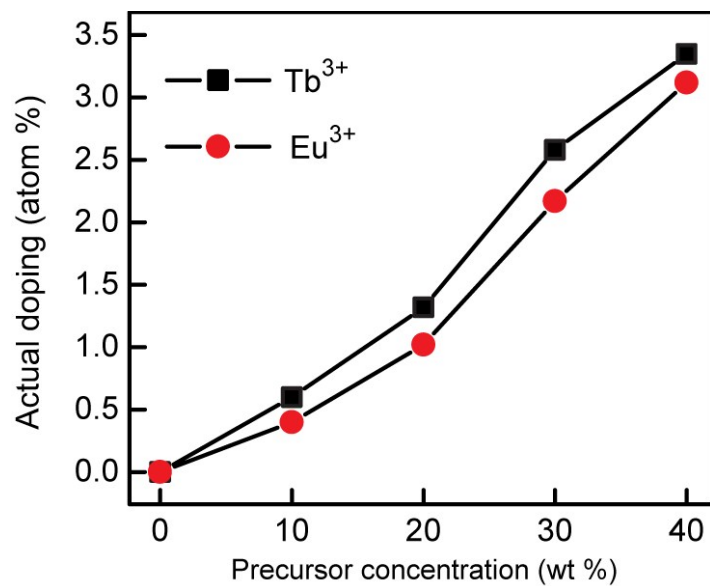

**Fig. S3** Variation of actual doping in atom% of RE<sup>3+</sup> doped in nanorods as obtained from EDS against the amount of RE<sup>3+</sup> precursors in weight% of Zn(NO<sub>3</sub>)<sub>2</sub>, used during the synthesis of doped ZnO nanorods.

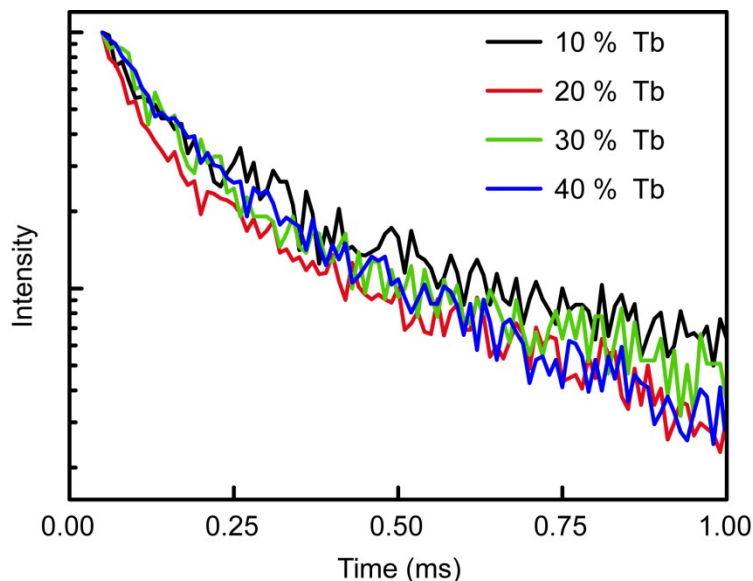

**Fig. S4** Fluorescence decays recorded for  $\text{Tb}^{3+}$  doped ZnO nanorods at the excitation wavelength of 290 nm and emission wavelength of 545 nm. Individual decay traces relate to different amount (weight %) of  $\text{Tb}^{3+}$  precursors used for doping: 10 weight% (black trace), 20 weight% (red trace), 30 weight% (green trace) and 40 weight% (blue trace).

**Table S1.** Fluorescence lifetimes ( $\tau$ ) and amplitude (A) recovered from fluorescence decays recorded for the solutions of ZnO nanorods with different  $\text{Tb}^{3+}$  content at the excitation wavelength of 290 nm and emission wavelength of 545 nm.

| atom% of $\text{Tb}^{3+}$ precursor | $A_1$ | $\tau_1/\mu\text{s}$ | $A_2$ | $\tau_2/\mu\text{s}$ |
|-------------------------------------|-------|----------------------|-------|----------------------|
| 0.6                                 | 0.77  | 84.5                 | 0.23  | 385                  |
| 1.32                                | 0.84  | 89.5                 | 0.16  | 382                  |
| 2.58                                | 0.90  | 97.2                 | 0.10  | 387                  |
| 3.35                                | 0.77  | 84.5                 | 0.23  | 385                  |

Note: All decays were analyzed by non linear curve fitting using origin 8.5 software.

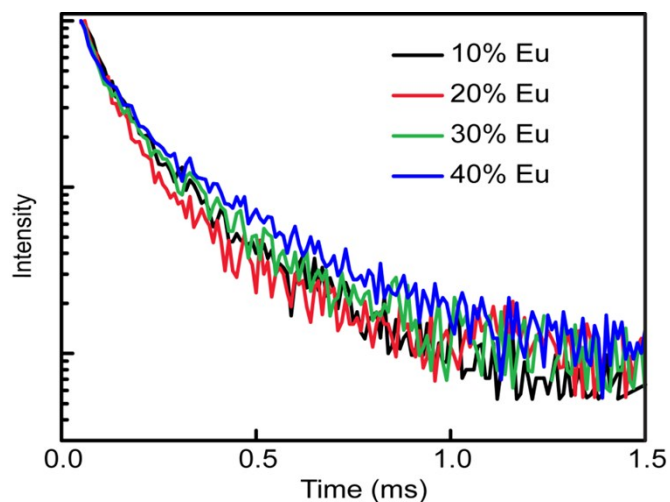

**Fig. S5** Fluorescence decays recorded for  $\text{Eu}^{3+}$  doped ZnO nanorods at the excitation wavelength of 290 nm and emission wavelength of 615 nm. Individual decay traces relate to different amount of  $\text{Eu}^{3+}$  precursors used for doping: 10 (black trace), 20 (red trace), 30 (green trace), and 40 weight% (blue trace).

**Table S2.** Fluorescence lifetimes ( $\tau$ ) and amplitude (A) recovered from fluorescence decays recorded for the solutions of ZnO nanorods with different  $\text{Eu}^{3+}$  content at the excitation wavelength of 290 nm and emission wavelength of 615 nm.

| atom% of $\text{Eu}^{3+}$ precursor | $A_1$ | $\tau_1/\mu\text{s}$ | $A_2$ | $\tau_2/\mu\text{s}$ |
|-------------------------------------|-------|----------------------|-------|----------------------|
| 0.4                                 | 0.88  | 70.5                 | 0.12  | 301                  |
| 1.05                                | 0.96  | 70.9                 | 0.04  | 280                  |
| 2.17                                | 0.84  | 51.1                 | 0.16  | 266                  |
| 3.12                                | 0.82  | 55.0                 | 0.18  | 311                  |

Note: All decays were analyzed by non linear curve fitting using origin 8.5 software.

**Table S3.** Fluorescence lifetime ( $\tau$ ) and amplitude (A) recovered from fluorescence decays of 40 weight% Tb<sup>3+</sup> doped ZnO nanorods at different emission wavelengths.

| $\lambda_{em}$ | $A_1$ | $\tau_1/ns$ | $A_2$ | $\tau_2/ns$ | $\langle\tau\rangle/ns$ | $\chi^2$ |
|----------------|-------|-------------|-------|-------------|-------------------------|----------|
| 520            | 0.25  | 5.02        | 0.75  | 39.03       | 41.0                    | 1.10     |
| 540            | 0.65  | 5.1         | 0.36  | 40.1        | 43.8                    | 1.07     |
| 580            | 0.22  | 6.35        | 0.78  | 43          | 45.2                    | 1.02     |

**Table S4.** Fluorescence lifetime ( $\tau$ ) and amplitude (A) recovered from fluorescence decays of 40 weight% Eu<sup>3+</sup> doped ZnO nanorods at different emission wavelengths.

| $\lambda_{em}$ | $A_1$ | $\tau_1/ns$ | $A_2$ | $\tau_2/ns$ | $\langle\tau\rangle/ns$ | $\chi^2$ |
|----------------|-------|-------------|-------|-------------|-------------------------|----------|
| 520            | 0.57  | 6.10        | 0.43  | 41.1        | 45.0                    | 1.04     |
| 540            | 0.24  | 7.30        | 0.76  | 43.8        | 46.3                    | 1.07     |
| 580            | 0.23  | 7.10        | 0.78  | 13.9        | 46.3                    | 1.12     |
